# Supplementary material
Source: HighWire-hosted journal article supplement (http://www.cmaj.ca/highwire/filestream/59191/field_highwire_adjunct_files/6/screen-wong-6-at.pdf)
Supplement: screen-wong-6-at.pdf [file screen-wong-6-at.pdf]

| Appendix 6 (as submitted by the authors): Cost-effectiveness results for restricted treatment (F2 – F4)                                                                                                                                                                                                                                                                                                              |                                                                        |                                                          |                     |                     |                      |                    |                               |
|----------------------------------------------------------------------------------------------------------------------------------------------------------------------------------------------------------------------------------------------------------------------------------------------------------------------------------------------------------------------------------------------------------------------|------------------------------------------------------------------------|----------------------------------------------------------|---------------------|---------------------|----------------------|--------------------|-------------------------------|
|                                                                                                                                                                                                                                                                                                                                                                                                                      |                                                                        | <b><u>Compared to Common baseline (No Screening)</u></b> |                     |                     |                      |                    |                               |
| <b><u>Age range</u></b>                                                                                                                                                                                                                                                                                                                                                                                              | <b><u>Strategy</u></b>                                                 | <b><u>Cost</u></b>                                       | <b><u>QALYs</u></b> | <b><u>ΔCost</u></b> | <b><u>ΔQALYs</u></b> | <b><u>ICER</u></b> | <b><u>Sequential ICER</u></b> |
| 25-64                                                                                                                                                                                                                                                                                                                                                                                                                | No screening                                                           | \$71,327                                                 | 13.7649             | -                   | -                    | -                  | -                             |
|                                                                                                                                                                                                                                                                                                                                                                                                                      | Screen & treat with PR                                                 | \$71,451                                                 | 13.7676             | \$124               | 0.0026               | \$47,466           | \$47,466*                     |
|                                                                                                                                                                                                                                                                                                                                                                                                                      | Screen & treat with<br>G1:simeprevir+PR<br>G2/3: SOF/RBV<br>G4/5/6: PR | \$71,556                                                 | 13.7698             | \$230               | 0.0048               | \$47,573           | \$47,573*                     |
|                                                                                                                                                                                                                                                                                                                                                                                                                      | Screen & treat with<br>G1: IFN-Free DAA<br>G2/3: SOF/RBV<br>G4/5/6: PR | \$71,557                                                 | 13.7709             | \$230               | 0.0060               | \$38,298           | \$38,298                      |
| 45-64                                                                                                                                                                                                                                                                                                                                                                                                                | No screening                                                           | \$83,334                                                 | 12.1024             | -                   | -                    | -                  | -                             |
|                                                                                                                                                                                                                                                                                                                                                                                                                      | Screen & treat with PR                                                 | \$83,473                                                 | 12.1061             | \$139               | 0.0036               | \$38,333           | \$38,333*                     |
|                                                                                                                                                                                                                                                                                                                                                                                                                      | Screen & treat with<br>G1:simeprevir+PR<br>G2/3: SOF/RBV<br>G4/5/6: PR | \$83,632                                                 | 12.1090             | \$298               | 0.0065               | \$45,636           | \$45,636*                     |
|                                                                                                                                                                                                                                                                                                                                                                                                                      | Screen & treat with<br>G1: IFN-Free DAA<br>G2/3: SOF/RBV<br>G4/5/6: PR | \$83,634                                                 | 12.1107             | \$300               | 0.0082               | \$36,348           | \$36,348                      |
| G1: genotype 1; G2/3: genotype 2 or 3; G4/5/6: genotype 4 or 5 or 6; PR = pegylated interferon plus ribavirin; QALY = quality-adjusted life-year; SIM = simeprevir;<br>SOF/RBV = sofosbuvir plus ribavirin; IFN-Free DAA = interferon-free direct-acting antiviral agents; ICER = incremental cost-effectiveness ratio<br>*Extendedly dominated = the combination of two other alternatives dominated the treatment. |                                                                        |                                                          |                     |                     |                      |                    |                               |
